# Supplementary material
Source: publisher figshare collection journal article supplement (https://tandf.figshare.com/ndownloader/files/20098757)
Supplement: Supplementary file 1 [file 20098757]

## Supplementary material

### Supplementary appendix A. Information about PDS items

Information about PDS items is collected in two separate modules: the rations module and a seven-day diary of food purchases. The former collects information about the quantity of ration items received, consumed, bartered, sold, or given away by the household during the previous 30 days. In the rations module, households are also asked how much they would pay in the open market to purchase each PDS or ration item. The diary records all purchases of food, including ration items, over the previous seven days (expenditures and quantities) (table SA.A.1). To estimate a household's consumption of PDS items, the analysis follows the methodology for the construction of the official welfare aggregate for estimating poverty (World Bank, 2013). Any purchases of PDS items recorded in the diary over the seven-day recall period are multiplied by a factor of 30/7 to obtain 30-day equivalents, and these quantities are added to the consumption of PDS items over the previous 30 days as recorded in the rations module. In practice, purchases of PDS items (recorded in the diary) are few and far between.

#### Table SA.A.1 near here

Next, these monthly quantities of PDS items need to be valued. Two key principles guide this valuation procedure. Households that consume (or purchase) a larger quantity of PDS items must be assigned higher consumption and, thereby, utility. Second, in principle, goods and services ought to be valued equal to the market price faced for the marginal unit consumed. In Iraq, ration items are rarely traded in the market, and a market-equivalent price is nonexistent. Few transactions are recorded in the diary. There are two main reasons why market prices or, in this case, unit values (the ratio of expenditure to quantity) from market transactions are not used as the reference for valuing ration items. The first is the insufficient number of observations per item. For instance; the share of households reporting purchases of ration items in the diary questionnaire varies from less than 1 per cent in the case of vegetable fat, lentils, brown wheat, and sugar to a maximum of less than 3 per cent in the case of rice. Furthermore, there are no transactions recorded in some geographical divisions for some items. Second, there is a possibility that these unit values may be associated with some households that are quantity constrained and purchased PDS items on the market because their allocation proved insufficient.

Additionally, the unit values for the nearest free-market equivalents are significantly higher for some items. For instance, the difference between the median unit value of ration rice and the unit value of diary and commercial local rice is 70 per cent (table SA.A.2). This gap doubles if one is comparing with the median unit value of imported commercial rice. This could be mainly related to important quality differences between these types of goods. This implies that market prices for commercially available items cannot be used to value all ration items because they are not perfect substitutes.

#### Table SA.A.2 near here

Another possibility is to use official prices for ration items. Two main concerns are relevant. The first is that these prices are low. Using these heavily subsidised prices would artificially suppress the value of food expenditures stemming from rations. The second concern is that rations should be valued

at a price close to the price at which the products would be traded. But these official prices are not prices at which households can procure unlimited quantities (by design). The remaining candidate for the valuation of rations is the self-reported value of ration items. The 2012 Iraq Household and Socio-Economic Survey (IHSES 2012) asks households how much they would pay for ration-equivalent items on the market.<sup>1</sup> In practice, few households expressed an opinion, and enumerators approached the local ration agent in the cluster in a manner akin to a price survey. However, there were variations in these prices that may reflect uncertainty, noise, and local variations in supply, demand, and quality. To ensure that all those who consume exactly the same amount of a ration item are assigned the same expenditure and, thereby, utility and that this expenditure increases with higher consumption, the methodology followed in the study uses the national median values of prices reported by ration agents to value ration items (World Bank, 2013).

## Supplementary appendix B. The mixed demand model

In a mixed demand model, there are  $n$  free-market products and  $m$  subsidised products. Let  $X = [x_1, \dots, x_n]$  be the vector of goods the prices of which are determined on the market. Let  $Z = [z_1, \dots, z_m]$  be the vector of goods the quantities of which are predetermined (quotas). Let  $p$  and  $q$  be the price vectors associated with  $X$  and  $Z$ , respectively. The mixed demand of a representative consumer is derived from the solution to the following maximisation problem (Moschini and Rizzi, 2007; Ramadan and Thomas, 2011):

$$\begin{aligned} \max_{x,q} u(x, z) - v(p, q, y) \\ \text{s. t. } p'x + q'z = y \end{aligned} \tag{SA.B.1}$$

where  $u$  and  $v$  are the direct and indirect utility functions, respectively, and  $y$  is the consumer's income (or total expenditure). Solving the first-order conditions of the above maximisation problem yields the vector of Marshallian mixed demands:

$$x^* = x(p, z, y) \text{ and } q^* = q(p, z, y) \tag{SA.B.2}$$

These yield the following optimum direct and indirect utility functions:<sup>2</sup>

$$\begin{aligned} u(x^*, z) &= v(p, q^*, y) \\ &\equiv V^M(p, z, y) \end{aligned} \tag{SA.B.3}$$

where  $V^M(p, z, y)$  is the mixed utility function. The mixed demand functions  $x(p, z, y)$  and  $q(p, z, y)$  satisfy the adding up conditions and are homogeneous of degree zero and degree one in  $p$  and  $y$ , respectively. The symmetry property applies to the compensated mixed demand functions that are the same as the compensated demand under rationing and may be characterised in terms of the restricted cost function as follows (Moschini & Rizzi, 2006, 2007):

$$C(p, z, u) \equiv \min_x \{p \cdot x \mid u(x, z) \geq u\} \tag{SA.B.4}$$

The restricted cost function  $C(p, z, u)$  is monotonic in its arguments and homogeneous of degree one and concave in  $p$ . Using Shepard's lemma, one finds that the partial derivatives of the cost function with respect to  $p$  and  $z$  yield the compensated (Hicksian) demand functions for the goods that are chosen optimally,  $x^h$ , and the compensated price-dependent functions,  $q^h$ , respectively. The latter are the prices that would have resulted in  $z$  being identified as the cost-minimising solution (Moschini and Anuradha, 1993; Moschini and Rizzi, 2007):

$$\nabla_p C(p, z, u) = x^h(p, z, u) \tag{SA.B.5}$$

$$\nabla_z C(p, z, u) = -q^h(p, z, u)$$

These Hicksian demands can be related to the Marshallian demands, as follows:

$$\begin{aligned} x(p, z, y) &= x^h(p, z, V^M(p, z, y)) \\ q(p, z, y) &= -q^h(p, z, V^M(p, z, y)) \end{aligned} \tag{SA.B.6}$$

So, for achieving a given utility level  $u$ , the total cost given  $(p, z)$  can be written as:

$$C^M(p, z, V^M(p, z, y)) = C(p, z, u) - \nabla_z C(p, z, u) \equiv y \tag{SA.B.7}$$

where  $C^M(p, z, V^M(p, z, y))$  is defined as the mixed cost function. According to Moschini and Rizzi (2007), the mixed utility function,  $V^M(p, z, y)$ , can be derived from equation (SA.B.7). For this, they select a cost function from the Gorman Polar form that is affine in  $u$ , as follows:

$$C(p, z, u) = F(p, z) + G(p, z)u \tag{SA.B.8}$$

where  $F$  and  $G$  are continuous and differentiable in  $p$  and  $z$ . Such a specification allows a closed form of the mixed utility function to be derived from the mixed cost function, as follows:

$$V^M(p, z, R) = \frac{R - F(p, z) + \nabla_z F(p, z)z}{G(p, z) - \nabla_z G(p, z)z} \tag{SA.B.9}$$

Following Diewert and Wales (1988) and Moschini and Rizzi (2007), the analysis uses a normalised quadratic form for the functions  $F$  and  $G$  to ensure that the chosen parameterisation satisfies the requirements of a flexible functional form, as follows:

$$\begin{aligned} F(p, z) &= \delta'p(a'p)(\mu'z) \\ G(p, z) &= \beta'p + (a'p)(\gamma'z) + 0.5(a'p)(z'\Gamma z) + p'Lz \end{aligned} \tag{SA.B.10}$$

Using the above specification, the mixed demand equations and the mixed utility can be written as follows:

$$\begin{aligned} x_i^* &= \delta_i + (\mu'z)a_i + \{\beta_i + \sum_{j=1}^n \frac{\beta_{ij}p_j}{a'p} + \sum_{k=1}^m \lambda_{ik}z_k \\ &\quad + a_i \left[ \gamma'z - 0.5 \left( \frac{p'Bp}{(a'p)^2} \right) + 0.5(z'\Gamma z) \right] \} V^M \end{aligned} \tag{SA.B.11}$$

$$-q_k^* = (a'p)\mu_k + [(a'p)\gamma_k + (a'p) \sum_{s=1}^m \gamma_{ks}z_s + \sum_{j=1}^n \lambda_{jk}p_j] V^M \quad (\text{SA.B.12})$$

$$V^M = \frac{y - \delta'p}{\beta'p + 0.5 \left( \frac{p'Bp}{(a'p)^2} \right) - 0.5(a'p)(z'\Gamma z)} \quad (\text{SA.B.13})$$

where  $i = 1, 2, \dots, n$  for the free-market products and  $k = 1, 2, \dots, m$  for the quantity determined products.

The structural estimation equations of the demand system can be written in terms of budget shares as follows:

$$\begin{aligned} W_i = & [\delta_i + (\mu'z)a_i \\ & + \left\{ \beta_i + \sum_{j=1}^n \frac{\beta_{ij}p_j}{a'p} \right. \\ & \left. + \sum_{k=1}^m \lambda_{ik}z_k + a_i \left[ \gamma'z - 0.5 \left( \frac{p'Bp}{(a'p)^2} \right) + 0.5(z'\Gamma z) \right] \right\} V^M] \frac{p_i}{y} + \varepsilon_i \end{aligned} \quad (\text{SA.B.14})$$

$$-W_k = [(a'p)\mu_k + [(a'p)\gamma_k + (a'p) \sum_{s=1}^m \gamma_{ks}z_s + \sum_{j=1}^n \lambda_{jk}p_j] V^M] \frac{z_k}{y} + \xi_k \quad (\text{SA.B.15})$$

The  $W_i$ 's and the  $W_k$ 's are the budget shares of the goods with predetermined prices and fixed quantities, respectively;  $\gamma$  and  $\mu$  are  $m \times 1$  vectors of parameters;  $B = [\beta_{ij}]$  is the  $n \times n$  matrix of parameters;  $\Gamma = [\gamma_{ks}]$  is the  $m \times m$  matrix of parameters;  $\beta_i$  and  $\delta_i$  are parameters to be estimated;  $a = [a_1, a_2, \dots, a_n]'$  is a vector of arbitrarily chosen coefficients to ensure the homogeneity property; and  $\varepsilon_i$  and  $\xi_k$  are error terms.

**Supplementary appendix C. Items included in the four free-market products**

**Table SA.C.1 here**

## Supplementary appendix D. The formulas of the estimated elasticities

Price elasticities of free-market goods ( $i, j=1,2,...n$ ):

$$\varepsilon_{ij} = \frac{\partial x_i^*(z, p, u)}{\partial p_j} * \frac{p_j}{x_i} \quad (\text{SA.D.1})$$

Own quantity mixed elasticities of ration items ( $k, s = 1,2,...m$ ):

$$\varepsilon_{ks} = \frac{\partial q_k^*(z, p, u)}{\partial z_s} * \frac{q_k}{z_s} \quad (\text{SA.D.2})$$

Elasticities of free-market goods with respect to ration goods:

$$\varepsilon_{ik} = \frac{\partial x_i^*(z, p, u)}{\partial z_k} * \frac{z_k}{x_i} \quad (\text{SA.D.3})$$

Price elasticities of ration items with respect to free-market goods:

$$\varepsilon_{kj} = \frac{\partial q_k^*(z, p, u)}{\partial p_j} * \frac{p_j}{q_k} \quad (\text{SA.D.4})$$

**Supplementary appendix E. The estimated results for the different quintiles in rural and urban areas**

**Tables SA.E.1–SA.E.7 here**

**Supplementary appendix F. The estimated results for Kurdistan and the rest of Iraq**

**Tables SA.F.1 and SA.F.2 here**

## Endnotes

<sup>1</sup> The question on the IHSES questionnaire is 'If you could buy this [ITEM] in the market, how much would you have to pay for it?'

<sup>2</sup> Given the duality between direct and indirect utility functions; the indirect utility function derived from a utility function achieves a minimum on prices such that  $u(x) = \min v(p,y)$ . Hence, for each level of  $x$ , there is a level of  $p$  such that:  $u(x) = v(p,y)$ .

## References

- Diewert, W. E., & Wales, T. J. (1988). Normalized quadratic systems of consumer demand functions. *Journal of Business and Economic Statistics*, 6, 303–312.
- Moschini, G. C., & Anuradha, V. (1993). Flexible specification of mixed demand systems. *American Journal of Agricultural Economics*, 75, 1–9.
- Moschini, G. C., & Rizzi, P. L. (2006). Coherent specification of a mixed demand system: The Stone-Geary model. In M. T. Holt & J.-P. Chavas (Eds), *Exploring frontiers in applied economics: Essays in honor of Stanley R. Johnson*. (Chapter 10). Berkeley, CA: Berkeley Electronic Press.
- Moschini, G. C., & Rizzi, P. L. (2007). Deriving a flexible mixed demand system: The normalized quadratic model. *American Journal of Agricultural Economics*, 89, 1034–1045.
- Ramadan, R., & Thomas, A. (2011). Evaluating the impact of reforming the food subsidy program in Egypt: A mixed demand approach. *Food Policy*, 36, 637–645.
- World Bank. (2013). *Poverty in Iraq, 2007–2012* (Methodological Note). Washington, DC: Author.

## Tables

Table SA.A.1. Average shares of ration items in total expenditure, four food items analysed (%)

|       | <i>Quintile</i> | <i>Poorest</i> | <i>2</i> | <i>3</i> | <i>4</i> | <i>Richest</i> |
|-------|-----------------|----------------|----------|----------|----------|----------------|
| Rural | Brown flour     | 32.9           | 28.1     | 24.7     | 21.4     | 16.1           |
|       | Rice            | 13.4           | 10.8     | 9.6      | 7.8      | 6.0            |
|       | Vegetable oil   | 20.1           | 17.4     | 15.5     | 13.9     | 10.9           |
|       | Sugar           | 16.7           | 14.5     | 13.0     | 11.5     | 9.1            |
| Urban | Brown flour     | 30.7           | 26.1     | 22.1     | 18.0     | 12.7           |
|       | Rice            | 12.8           | 11.2     | 9.2      | 7.5      | 5.0            |
|       | Vegetable oil   | 19.4           | 17.0     | 15.2     | 13.3     | 10.5           |
|       | Sugar           | 16.1           | 14.5     | 13.0     | 11.5     | 9.2            |

Source: Estimations based on IHSES 2012.

Table SA.A.2. Unit values of rationed items and free-market counterparts

| <i>Variable</i>                     | <i>Observations</i> | <i>Mean</i> | <i>Std. Dev.</i> | <i>Min</i> | <i>Max</i> |
|-------------------------------------|---------------------|-------------|------------------|------------|------------|
| Price of rationed brown wheat flour | 1140                | 0.532       | 0.048            | 0.415      | 1.019      |
| Price of rationed rice              | 1140                | 0.745       | 0.067            | 0.607      | 1.426      |
| Price of rationed sugar             | 1140                | 1.594       | 0.143            | 1.236      | 3.056      |
| Price of rationed vegetable oil     | 1140                | 2.392       | 0.218            | 1.866      | 4.621      |
| Price of free-market cereals        | 1140                | 1.723       | 0.641            | 0.497      | 6.840      |
| Price of free-market rice"          | 1140                | 1.236       | 0.194            | 0.557      | 2.228      |
| Price of free-market sweets         | 1140                | 3.041       | 1.219            | 1.000      | 12.731     |
| Price of free-market oil            | 1140                | 1.653       | 0.630            | 1.000      | 8.603      |

Table SA.C.1. Items included in the four free-market products

| <i>Cereals</i>                  | <i>Sweets</i>                | <i>Oil</i>                 | <i>Rice</i>                |
|---------------------------------|------------------------------|----------------------------|----------------------------|
| Wheat                           | Assorted sweets              | Vegetable fat (commercial) | Commercial rice (imported) |
| Brown wheat flour (commercial)  | Chocolate                    | Animal fat (ghee)          | Commercial rice (local)    |
| White wheat flour (commercial)  | Jam                          | Vegetable oil (commercial) | Ground rice                |
| Barley                          | Honey                        | Olive oil                  |                            |
| Barley flour                    | Date syrup                   | Sesame oil                 |                            |
| Maize                           | Artificially flavoured juice | Other oils                 |                            |
| Burghul (cracked wheat)         | Chewing gum                  |                            |                            |
| Habbiya (whole roasted wheat)   | Ice-cream                    |                            |                            |
| Jareesh and sameed              | Ice                          |                            |                            |
| Macaroni and vermicelli         |                              |                            |                            |
| Starch                          |                              |                            |                            |
| Cornflakes                      |                              |                            |                            |
| Corn crisps                     |                              |                            |                            |
| Corn chips                      |                              |                            |                            |
| Bread, all types                |                              |                            |                            |
| Buns, all types and sizes       |                              |                            |                            |
| Kahi (local millefeuille)       |                              |                            |                            |
| Klecha (local pastry)           |                              |                            |                            |
| Cake                            |                              |                            |                            |
| Biscuits                        |                              |                            |                            |
| Rusk and zwieback               |                              |                            |                            |
| Ready-made pizza                |                              |                            |                            |
| Other bread and bakery products |                              |                            |                            |

Source: Estimations based on IHSES 2012.

Table SA.E.1. Price elasticities of free-market goods

|                                  | <i>Poorest</i> | <i>2</i> | <i>3</i> | <i>4</i> | <i>Richest</i> |
|----------------------------------|----------------|----------|----------|----------|----------------|
| <i>Rural areas</i>               |                |          |          |          |                |
| Cereals with respect to price of |                |          |          |          |                |
| Cereals                          | -0.003         | -0.004   | -0.001   | 0.000    | -0.004         |
| Rice                             | 0.022          | 0.011    | 0.011    | 0.011    | 0.006          |
| Sweets                           | -0.062         | -0.043   | -0.037   | -0.032   | -0.030         |
| Oils                             | -0.025         | -0.007   | -0.013   | -0.017   | -0.019         |
| Rice with respect to price of    |                |          |          |          |                |
| Cereals                          | 0.083          | 0.044    | 0.034    | 0.026    | 0.010          |
| Rice                             | -0.019         | -0.015   | -0.008   | -0.006   | -0.005         |
| Sweets                           | -0.062         | -0.046   | -0.031   | -0.025   | -0.019         |
| Oils                             | -0.282         | -0.162   | -0.134   | -0.120   | -0.089         |
| Sweets with respect to price of  |                |          |          |          |                |
| Cereals                          | -0.062         | -0.050   | -0.035   | -0.028   | -0.028         |
| Rice                             | -0.036         | -0.029   | -0.020   | -0.017   | -0.018         |
| Sweets                           | -0.035         | -0.034   | -0.026   | -0.024   | -0.032         |
| Oils                             | -0.151         | -0.092   | -0.110   | -0.124   | -0.155         |
| Oil with respect to price of     |                |          |          |          |                |
| Cereals                          | 0.201          | 0.104    | 0.076    | 0.068    | 0.038          |
| Rice                             | 0.180          | 0.088    | 0.067    | 0.068    | 0.039          |
| Sweets                           | 0.394          | 0.202    | 0.164    | 0.159    | 0.092          |
| Oils                             | -0.761         | -0.378   | -0.288   | -0.280   | -0.105         |
| <i>Urban areas</i>               |                |          |          |          |                |
| Cereals with respect to price of |                |          |          |          |                |
| Cereals                          | 0.003          | 0.002    | 0.002    | 0.001    | 0.001          |
| Rice                             | 0.023          | 0.017    | 0.015    | 0.012    | 0.011          |
| Sweets                           | -0.058         | -0.041   | -0.036   | -0.031   | -0.027         |
| Oils                             | -0.015         | -0.016   | -0.014   | -0.013   | -0.019         |
| Rice with respect to price of    |                |          |          |          |                |
| Cereals                          | 0.091          | 0.067    | 0.045    | 0.031    | 0.019          |

|                                 |        |        |        |        |        |
|---------------------------------|--------|--------|--------|--------|--------|
| Rice                            | -0.017 | -0.012 | -0.008 | -0.006 | -0.002 |
| Sweets                          | -0.077 | -0.054 | -0.039 | -0.031 | -0.021 |
| Oils                            | -0.273 | -0.222 | -0.162 | -0.129 | -0.116 |
| Sweets with respect to price of |        |        |        |        |        |
| Cereals                         | -0.045 | -0.034 | -0.027 | -0.023 | -0.018 |
| Rice                            | -0.028 | -0.021 | -0.017 | -0.015 | -0.010 |
| Sweets                          | -0.035 | -0.026 | -0.024 | -0.024 | -0.023 |
| Oils                            | -0.117 | -0.112 | -0.107 | -0.108 | -0.170 |
| Oil with respect to price of    |        |        |        |        |        |
| Cereals                         | 0.171  | 0.139  | 0.095  | 0.078  | 0.054  |
| Rice                            | 0.182  | 0.148  | 0.109  | 0.094  | 0.073  |
| Sweets                          | 0.423  | 0.336  | 0.247  | 0.212  | 0.162  |
| Oils                            | -0.843 | -0.696 | -0.509 | -0.429 | -0.313 |

---

*Source:* Estimations based on IHSES 2012.

Table SA.E.2. Own quantity mixed elasticities of ration items

|                                     |               | <i>Poorest</i> | <i>2</i> | <i>3</i> | <i>4</i> | <i>Richest</i> |
|-------------------------------------|---------------|----------------|----------|----------|----------|----------------|
| <i>Rural areas</i>                  |               |                |          |          |          |                |
| Brown flour price with respect to   |               |                |          |          |          |                |
| Ration                              | Brown flour   | -0.032         | -0.034   | -0.041   | -0.047   | -0.066         |
|                                     | Rice          | -0.005         | -0.001   | -0.004   | -0.007   | 0.002          |
|                                     | Sugar         | 0.034          | 0.033    | 0.043    | 0.051    | 0.062          |
|                                     | Vegetable oil | 0.018          | 0.021    | 0.024    | 0.027    | 0.042          |
| Rice price with respect to          |               |                |          |          |          |                |
| Ration                              | Brown flour   | -0.004         | -0.004   | -0.005   | -0.006   | -0.009         |
|                                     | Rice          | -0.030         | -0.030   | -0.036   | -0.042   | -0.050         |
|                                     | Sugar         | 0.020          | 0.020    | 0.025    | 0.028    | 0.036          |
|                                     | Vegetable oil | -0.043         | -0.045   | -0.054   | -0.062   | -0.082         |
| Sugar price with respect to         |               |                |          |          |          |                |
| Ration                              | Brown flour   | 0.012          | 0.012    | 0.015    | 0.017    | 0.023          |
|                                     | Rice          | 0.010          | 0.010    | 0.012    | 0.014    | 0.018          |
|                                     | Sugar         | -0.006         | -0.006   | -0.008   | -0.009   | -0.013         |
|                                     | Vegetable oil | 0.004          | 0.004    | 0.005    | 0.006    | 0.008          |
| Vegetable oil price with respect to |               |                |          |          |          |                |
| Ration                              | Brown flour   | 0.004          | 0.004    | 0.005    | 0.006    | 0.008          |
|                                     | Rice          | -0.012         | -0.013   | -0.016   | -0.018   | -0.024         |
|                                     | Sugar         | 0.002          | 0.002    | 0.002    | 0.002    | 0.003          |
|                                     | Vegetable oil | -0.001         | -0.001   | -0.001   | -0.002   | -0.002         |
| <i>Urban areas</i>                  |               |                |          |          |          |                |
| Brown flour price with respect to   |               |                |          |          |          |                |
| Ration                              | Brown flour   | -0.030         | -0.034   | -0.037   | -0.042   | -0.059         |
|                                     | Rice          | -0.009         | -0.011   | -0.012   | -0.013   | -0.018         |
|                                     | Sugar         | 0.035          | 0.041    | 0.046    | 0.053    | 0.082          |
|                                     | Vegetable oil | 0.016          | 0.018    | 0.020    | 0.024    | 0.035          |
| Rice price with respect to          |               |                |          |          |          |                |
| Ration                              | Brown flour   | -0.004         | -0.004   | -0.005   | -0.006   | -0.008         |

|                                     |               |        |        |        |        |        |
|-------------------------------------|---------------|--------|--------|--------|--------|--------|
|                                     | Rice          | -0.028 | -0.033 | -0.035 | -0.039 | -0.051 |
|                                     | Sugar         | 0.019  | 0.022  | 0.024  | 0.027  | 0.041  |
|                                     | Vegetable oil | -0.041 | -0.049 | -0.054 | -0.061 | -0.092 |
| Sugar price with respect to         |               |        |        |        |        |        |
|                                     | Brown flour   | 0.011  | 0.013  | 0.014  | 0.016  | 0.023  |
| Ration                              | Rice          | 0.009  | 0.010  | 0.011  | 0.013  | 0.017  |
|                                     | Sugar         | -0.006 | -0.006 | -0.007 | -0.008 | -0.013 |
|                                     | Vegetable oil | 0.004  | 0.004  | 0.005  | 0.005  | 0.008  |
| Vegetable oil price with respect to |               |        |        |        |        |        |
|                                     | Brown flour   | 0.004  | 0.004  | 0.005  | 0.005  | 0.007  |
| Ration                              | Rice          | -0.012 | -0.014 | -0.015 | -0.017 | -0.023 |
|                                     | Sugar         | 0.002  | 0.002  | 0.002  | 0.002  | 0.004  |
|                                     | Vegetable oil | -0.001 | -0.001 | -0.001 | -0.002 | -0.003 |

---

*Source:* Estimations based on IHSES 2012.

Table SA.E.3. Elasticities of free-market goods with respect to ration items, rural areas, quintiles

|                         |               | <i>Poorest</i> | <i>2</i> | <i>3</i> | <i>4</i> | <i>Richest</i> |
|-------------------------|---------------|----------------|----------|----------|----------|----------------|
| Cereals with respect to |               |                |          |          |          |                |
| Ration                  | Brown flour   | −0.034         | −0.021   | −0.015   | −0.008   | −0.003         |
|                         | Rice          | 0.116          | 0.068    | 0.059    | 0.048    | 0.035          |
|                         | Sugar         | 0.008          | 0.005    | 0.004    | 0.002    | 0.001          |
|                         | Vegetable oil | −0.025         | −0.016   | −0.013   | −0.010   | −0.007         |
| Rice with respect to    |               |                |          |          |          |                |
| Ration                  | Brown flour   | 0.300          | 0.184    | 0.131    | 0.102    | 0.061          |
|                         | Rice          | 0.085          | 0.051    | 0.035    | 0.027    | 0.015          |
|                         | Sugar         | −0.017         | −0.010   | −0.008   | −0.006   | −0.004         |
|                         | Vegetable oil | −0.009         | −0.006   | −0.004   | −0.003   | −0.001         |
| Sweets with respect to  |               |                |          |          |          |                |
| Ration                  | Brown flour   | 0.245          | 0.162    | 0.139    | 0.120    | 0.100          |
|                         | Rice          | 0.033          | 0.021    | 0.018    | 0.014    | 0.010          |
|                         | Sugar         | 0.060          | 0.042    | 0.034    | 0.028    | 0.022          |
|                         | Vegetable oil | 0.014          | 0.009    | 0.009    | 0.008    | 0.007          |
| Oil with respect to     |               |                |          |          |          |                |
| Ration                  | Brown flour   | −1.107         | −0.532   | −0.432   | −0.395   | −0.227         |
|                         | Rice          | −0.313         | −0.150   | −0.123   | −0.116   | −0.066         |
|                         | Sugar         | −0.086         | −0.042   | −0.035   | −0.033   | −0.018         |
|                         | Vegetable oil | −0.074         | −0.037   | −0.030   | −0.027   | −0.016         |

*Source:* Estimations based on IHSES 2012.

Table SA.E.4. Price elasticities of ration items with respect to free-market goods, rural areas, quintiles

|                                      |         | <i>Poorest</i> | <i>2</i> | <i>3</i> | <i>4</i> | <i>Richest</i> |
|--------------------------------------|---------|----------------|----------|----------|----------|----------------|
| Ration brown flour with respect to   |         |                |          |          |          |                |
| Free market                          | Cereals | 0.088          | 0.103    | 0.093    | 0.067    | 0.058          |
|                                      | Rice    | -0.408         | -0.405   | -0.494   | -0.627   | -0.866         |
|                                      | Sweets  | -0.342         | -0.360   | -0.465   | -0.582   | -0.782         |
|                                      | Oils    | 0.976          | 0.989    | 1.211    | 1.477    | 1.910          |
| Ration rice with respect to          |         |                |          |          |          |                |
| Free market                          | Cereals | -0.205         | -0.204   | -0.239   | -0.255   | -0.291         |
|                                      | Rice    | -0.064         | -0.062   | -0.073   | -0.087   | -0.111         |
|                                      | Sweets  | -0.012         | -0.012   | -0.013   | -0.013   | -0.012         |
|                                      | Oils    | 0.235          | 0.230    | 0.275    | 0.306    | 0.364          |
| Ration sugar with respect to         |         |                |          |          |          |                |
| Free market                          | Cereals | -0.009         | -0.009   | -0.010   | -0.009   | -0.007         |
|                                      | Rice    | 0.001          | 0.001    | 0.002    | 0.003    | 0.006          |
|                                      | Sweets  | -0.036         | -0.039   | -0.048   | -0.056   | -0.071         |
|                                      | Oils    | 0.020          | 0.021    | 0.029    | 0.036    | 0.045          |
| Ration vegetable oil with respect to |         |                |          |          |          |                |
| Free market                          | Cereals | 0.021          | 0.021    | 0.024    | 0.024    | 0.025          |
|                                      | Rice    | 0.009          | 0.009    | 0.010    | 0.012    | 0.014          |
|                                      | Sweets  | 0.000          | 0.000    | 0.000    | -0.002   | -0.005         |
|                                      | Oils    | -0.015         | -0.015   | -0.016   | -0.016   | -0.018         |

*Source:* Estimations based on IHSES 2012.

Table SA.E.5. Elasticities of free-market goods with respect to ration items, urban areas, quintiles

|                                   |               | <i>Poorest</i> | <i>2</i> | <i>3</i> | <i>4</i> | <i>Richest</i> |
|-----------------------------------|---------------|----------------|----------|----------|----------|----------------|
| Cereals with respect to ration of |               |                |          |          |          |                |
| Ration                            | Brown flour   | -0.028         | -0.017   | -0.012   | -0.008   | -0.003         |
|                                   | Rice          | 0.092          | 0.067    | 0.053    | 0.043    | 0.033          |
|                                   | Sugar         | 0.007          | 0.005    | 0.003    | 0.002    | 0.001          |
|                                   | Vegetable oil | -0.021         | -0.015   | -0.012   | -0.010   | -0.008         |
| Rice with respect to ration of    |               |                |          |          |          |                |
| Ration                            | Brown flour   | 0.318          | 0.231    | 0.160    | 0.119    | 0.078          |
|                                   | Rice          | 0.090          | 0.065    | 0.043    | 0.031    | 0.018          |
|                                   | Sugar         | -0.016         | -0.012   | -0.008   | -0.006   | -0.005         |
|                                   | Vegetable oil | -0.011         | -0.008   | -0.005   | -0.004   | -0.002         |
| Sweets with respect to ration of  |               |                |          |          |          |                |
| Ration                            | Brown flour   | 0.197          | 0.156    | 0.129    | 0.109    | 0.103          |
|                                   | Rice          | 0.026          | 0.020    | 0.015    | 0.012    | 0.010          |
|                                   | Sugar         | 0.051          | 0.040    | 0.032    | 0.027    | 0.025          |
|                                   | Vegetable oil | 0.011          | 0.010    | 0.008    | 0.007    | 0.008          |
| Oil with respect to ration of     |               |                |          |          |          |                |
| Ration                            | Brown flour   | -0.994         | -0.778   | -0.555   | -0.463   | -0.354         |
|                                   | Rice          | -0.281         | -0.225   | -0.157   | -0.133   | -0.098         |
|                                   | Sugar         | -0.082         | -0.067   | -0.048   | -0.042   | -0.035         |
|                                   | Vegetable oil | -0.067         | -0.053   | -0.038   | -0.032   | -0.026         |

Source: Estimations based on IHSES 2012.

Table SA.E.6. Price elasticities of ration items with respect to free-market goods, urban areas

|                                              |         | <i>Poorest</i> | <i>2</i> | <i>3</i> | <i>4</i> | <i>Richest</i> |
|----------------------------------------------|---------|----------------|----------|----------|----------|----------------|
| <i>Ration brown flour with respect to</i>    |         |                |          |          |          |                |
|                                              | Cereals | 0.067          | 0.063    | 0.054    | 0.048    | 0.021          |
| Free market                                  | Rice    | -0.422         | -0.500   | -0.574   | -0.667   | -1.002         |
|                                              | Sweets  | -0.393         | -0.463   | -0.537   | -0.627   | -0.932         |
|                                              | Oils    | 1.063          | 1.227    | 1.389    | 1.581    | 2.250          |
| <i>Ration price of rice with respect to</i>  |         |                |          |          |          |                |
|                                              | Cereals | -0.181         | -0.210   | -0.219   | -0.230   | -0.296         |
| Free market                                  | Rice    | -0.063         | -0.073   | -0.080   | -0.089   | -0.126         |
|                                              | Sweets  | -0.013         | -0.014   | -0.014   | -0.013   | -0.013         |
|                                              | Oils    | 0.210          | 0.249    | 0.263    | 0.283    | 0.385          |
| <i>Ration price of sugar with respect to</i> |         |                |          |          |          |                |
|                                              | Cereals | -0.010         | -0.010   | -0.010   | -0.010   | -0.009         |
| Free market                                  | Rice    | 0.000          | 0.001    | 0.001    | 0.002    | 0.005          |
|                                              | Sweets  | -0.042         | -0.048   | -0.054   | -0.061   | -0.085         |
|                                              | Oils    | 0.027          | 0.031    | 0.037    | 0.042    | 0.063          |
| <i>Ration price of oil with respect to</i>   |         |                |          |          |          |                |
|                                              | Cereals | 0.019          | 0.021    | 0.022    | 0.022    | 0.026          |
| Free market                                  | Rice    | 0.010          | 0.011    | 0.012    | 0.012    | 0.016          |
|                                              | Sweets  | 0.001          | 0.000    | -0.001   | -0.002   | -0.005         |
|                                              | Oils    | -0.013         | -0.014   | -0.015   | -0.015   | -0.020         |

Source: Estimations based on IHSES 2012.

Table SA.E.7. Expenditure elasticities, by quintile of per capita consumption and area

| Quintile     | Ration product |        |        |               | Equivalent free-market product |       |        |        |
|--------------|----------------|--------|--------|---------------|--------------------------------|-------|--------|--------|
|              | Brown flour    | Rice   | Sugar  | Vegetable oil | Cereal                         | Rice  | Sweets | Oils   |
| <i>Rural</i> |                |        |        |               |                                |       |        |        |
| 1            | 0.015          | -0.024 | 0.005  | 0.021         | 0.086                          | 0.353 | 0.359  | -0.017 |
| 2            | 0.084          | -0.005 | 0.006  | 0.023         | 0.054                          | 0.227 | 0.259  | -0.021 |
| 3            | 0.059          | -0.009 | 0.005  | 0.027         | 0.045                          | 0.155 | 0.213  | -0.022 |
| 4            | 0.027          | 0.003  | 0.005  | 0.030         | 0.037                          | 0.118 | 0.180  | -0.013 |
| 5            | 0.263          | 0.082  | 0.017  | 0.044         | 0.033                          | 0.072 | 0.166  | -0.046 |
| <i>Urban</i> |                |        |        |               |                                |       |        |        |
| 1            | -0.057         | -0.008 | 0.000  | 0.019         | 0.060                          | 0.359 | 0.292  | 0.087  |
| 2            | -0.073         | -0.014 | 0.000  | 0.022         | 0.044                          | 0.256 | 0.224  | 0.085  |
| 3            | -0.093         | -0.004 | -0.001 | 0.025         | 0.035                          | 0.175 | 0.187  | 0.061  |
| 4            | -0.088         | 0.012  | -0.001 | 0.028         | 0.029                          | 0.129 | 0.162  | 0.042  |
| 5            | -0.146         | 0.035  | -0.002 | 0.041         | 0.023                          | 0.082 | 0.152  | 0.017  |

Source: Estimations based on IHSES 2012.

Table SA.F.1. Own-price elasticities of ration items, by quintile of per capita consumption and area, 2012

| Quintile            | Ration product |        |        |               | Equivalent free-market product |        |        |        |
|---------------------|----------------|--------|--------|---------------|--------------------------------|--------|--------|--------|
|                     | Brown flour    | Rice   | Sugar  | Vegetable oil | Cereal                         | Rice   | Sweets | Oils   |
| <i>Kurdistan</i>    |                |        |        |               |                                |        |        |        |
| 1                   | -0.032         | -0.038 | -0.006 | -0.005        | 0.010                          | -0.004 | -0.013 | -1.034 |
| 2                   | -0.037         | -0.046 | -0.007 | -0.007        | 0.006                          | -0.002 | -0.005 | -0.941 |
| 3                   | -0.040         | -0.044 | -0.007 | -0.007        | 0.003                          | -0.004 | -0.013 | -0.457 |
| 4                   | -0.048         | -0.055 | -0.009 | -0.009        | 0.005                          | 0.000  | -0.011 | -0.541 |
| 5                   | -0.076         | -0.080 | -0.016 | -0.015        | 0.006                          | 0.002  | -0.010 | -0.398 |
| <i>Rest of Iraq</i> |                |        |        |               |                                |        |        |        |
| 1                   | -0.030         | -0.029 | -0.005 | -0.004        | 0.009                          | -0.007 | -0.048 | -0.533 |
| 2                   | -0.033         | -0.032 | -0.006 | -0.005        | 0.007                          | -0.005 | -0.035 | -0.370 |
| 3                   | -0.038         | -0.038 | -0.007 | -0.005        | 0.007                          | 0.000  | -0.028 | -0.321 |
| 4                   | -0.043         | -0.042 | -0.007 | -0.006        | 0.006                          | 0.000  | -0.026 | -0.271 |
| 5                   | -0.058         | -0.053 | -0.011 | -0.009        | 0.003                          | 0.000  | -0.029 | -0.133 |

Source: Estimations based on IHSES 2012.

Table SA.F.2. Expenditure elasticities, by quintile of per capita consumption and region

| Quintile            | Ration product |       |       |               | Equivalent free-market product |      |        |       |
|---------------------|----------------|-------|-------|---------------|--------------------------------|------|--------|-------|
|                     | Brown flour    | Rice  | Sugar | Vegetable oil | Cereal                         | Rice | Sweets | Oils  |
| <i>Kurdistan</i>    |                |       |       |               |                                |      |        |       |
| 1                   | -0.04          | -0.07 | 0.00  | 0.03          | 0.04                           | 0.29 | 0.21   | 0.16  |
| 2                   | -0.10          | -0.11 | 0.00  | 0.03          | 0.04                           | 0.18 | 0.20   | 0.17  |
| 3                   | -0.02          | -0.07 | 0.00  | 0.04          | 0.03                           | 0.12 | 0.18   | 0.06  |
| 4                   | -0.13          | -0.07 | 0.00  | 0.04          | 0.03                           | 0.09 | 0.15   | 0.08  |
| 5                   | -0.34          | -0.07 | -0.01 | 0.07          | 0.02                           | 0.06 | 0.14   | 0.05  |
| <i>Rest of Iraq</i> |                |       |       |               |                                |      |        |       |
| 1                   | 0.03           | 0.01  | 0.00  | 0.02          | 0.090                          | 0.46 | 0.37   | -0.13 |
| 2                   | 0.05           | 0.02  | 0.00  | 0.03          | 0.06                           | 0.35 | 0.25   | -0.09 |
| 3                   | 0.00           | 0.02  | 0.00  | 0.03          | 0.04                           | 0.25 | 0.21   | -0.07 |
| 4                   | -0.02          | 0.03  | 0.00  | 0.03          | 0.03                           | 0.20 | 0.17   | -0.06 |
| 5                   | 0.06           | 0.09  | 0.00  | 0.05          | 0.03                           | 0.12 | 0.16   | -0.06 |

Source: Estimations based on IHSES 2012.
